# Supplementary material for: A transcriptional roadmap for 2C-like–to–pluripotent state transition
Source: PubMed Central journal article supplement — Sci Adv. 2020 May 29;6(22):eaay5181. doi: 10.1126/sciadv.aay5181 (PMC7259939; doi:10.1126/sciadv.aay5181), 2020-05-29
Supplement: aay5181_SM.pdf [file aay5181_SM.pdf]

## Supplementary Materials for

### **A transcriptional roadmap for 2C-like-to-pluripotent state transition**

Xudong Fu, Mohamed Nadhir Djekidel, Yi Zhang\*

\*Corresponding author. Email: [yzhang@genetics.med.harvard.edu](mailto:yzhang@genetics.med.harvard.edu)

Published 29 May 2020, *Sci. Adv.* **6**, eaay5181 (2020)

DOI: [10.1126/sciadv.aay5181](https://doi.org/10.1126/sciadv.aay5181)

#### **The PDF file includes:**

Figs. S1 to S4

#### **Other Supplementary Material for this manuscript includes the following:**

(available at [advances.sciencemag.org/cgi/content/full/6/22/eaay5181/DC1](https://advances.sciencemag.org/cgi/content/full/6/22/eaay5181/DC1))

Tables S1 to S6

## Supplementary Materials

fig. S1

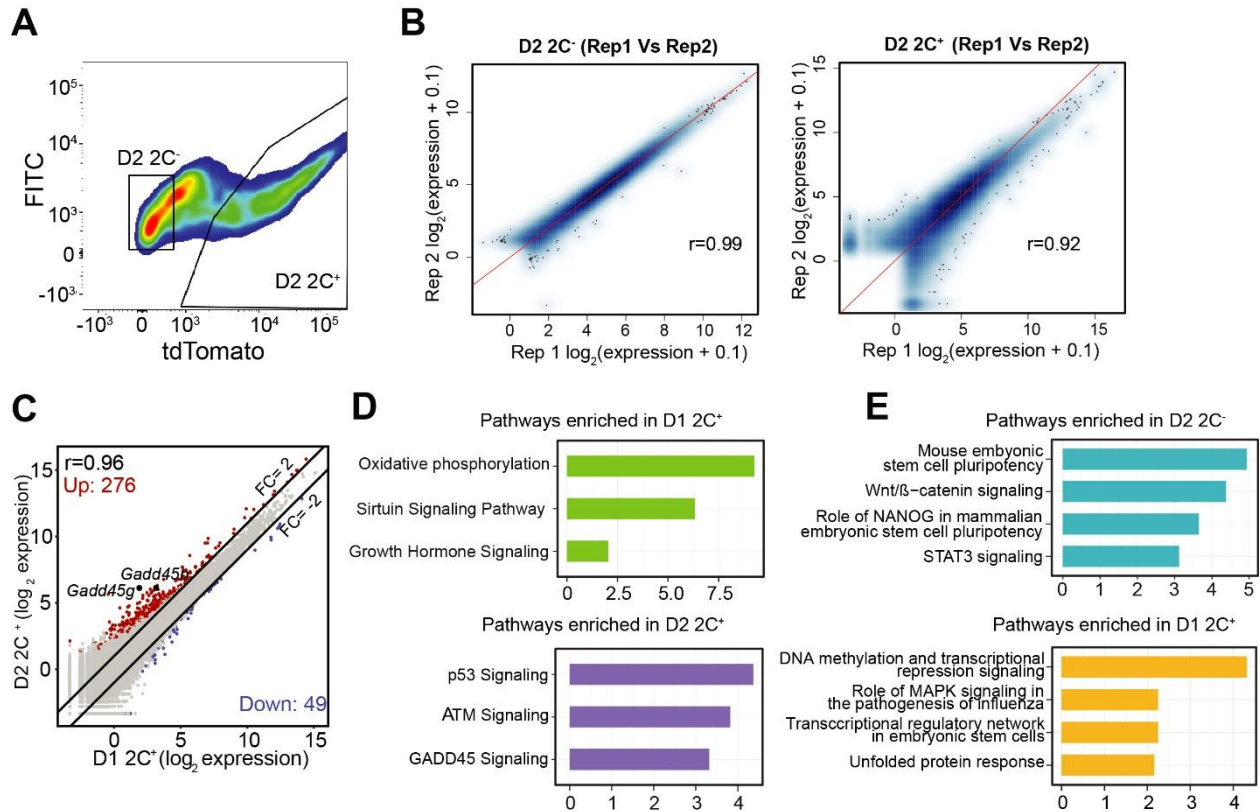

**fig. S1. Bulk RNA-seq indicates that D2 2C<sup>+</sup> cells maintain their 2C-like state and D2 2C<sup>-</sup> cells exit from 2C-like state.** (A) FACS gating for cell isolation. (B) Scatter plots showing good correlation (Pearson) between the transcriptomes of biological replicates of D2 2C<sup>-</sup> and D2 2C<sup>+</sup> cells. (C) Scatter plot comparing gene expression profiles between D2 2C<sup>+</sup> and D1 2C<sup>+</sup> population. Criteria: FC>2 and FDR < 0.001. Genes up-regulated in D2 2C<sup>+</sup> cells are indicated in red and genes up-regulated in D1 2C<sup>+</sup> are indicated in blue. Pearson correlation r=0.96. (D) Bar plot showing the  $-\log_{10}(\text{p-value})$  of the pathways enriched in D2 2C<sup>+</sup> and D1 2C<sup>+</sup> cells (right, right-tailed Fisher-exact test). (E) Bar plot showing the  $-\log_{10}(\text{p-value})$  of the pathways enriched in D1 2C<sup>+</sup> and D2 2C<sup>-</sup> cells (right, right-tailed Fisher-exact test).

fig. S2

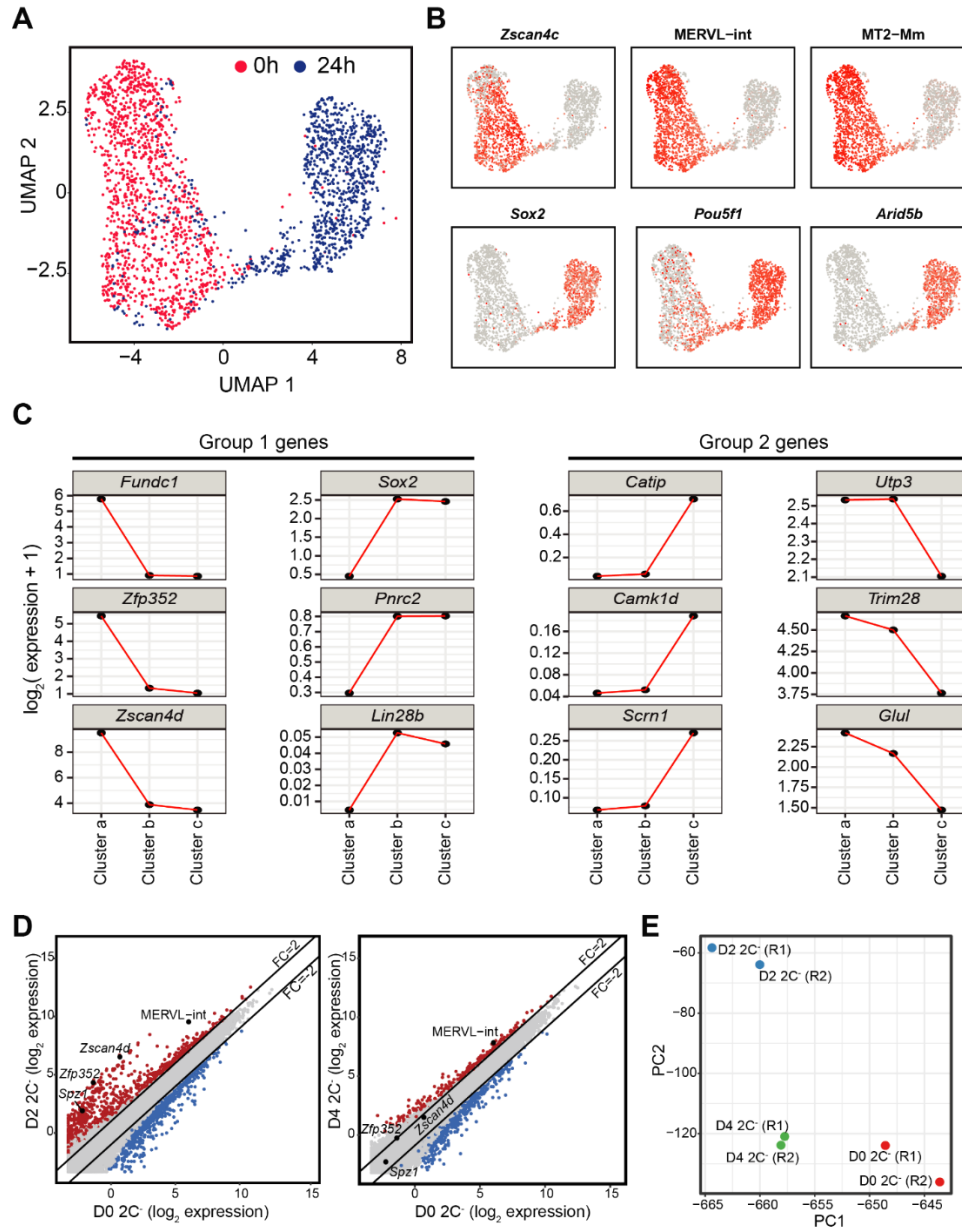

**fig. S2. Single-cell RNA-seq reveals the existence of an intermediate cell cluster during 2C<sup>-</sup>-like to pluripotent state transition.** (A) UMAP plot showing the cells collected at 0h (red) and 24h (blue). (B) UMAP plot showing the expression of representative genes in each sequenced cell (n=2,872 cells). grey: no-expression, gradient red colors: expressed genes with bright red being the highest expression. (C) Mean expression of representative genes in each cell cluster. (D) Scatter plot comparing the mean expression of bulk RNA-seq between D2 2C<sup>-</sup> and D0 2C<sup>-</sup> cells (left panel) or between D4 2C<sup>-</sup> and D0 2C<sup>-</sup> cells (right panel). Criteria: FC>2 and FDR<0.001. (E) PCA projection of the bulk RNA-seq samples at D0 2C<sup>-</sup>, D2 2C<sup>-</sup>, and D4 2C<sup>-</sup>

cells. R1 and R2 indicate two replicates. (D-E), D4 2C<sup>-</sup> cells refers to D2 2C<sup>-</sup> cells that are cultured for additional 48 h in the absence of doxycycline.

fig. S3

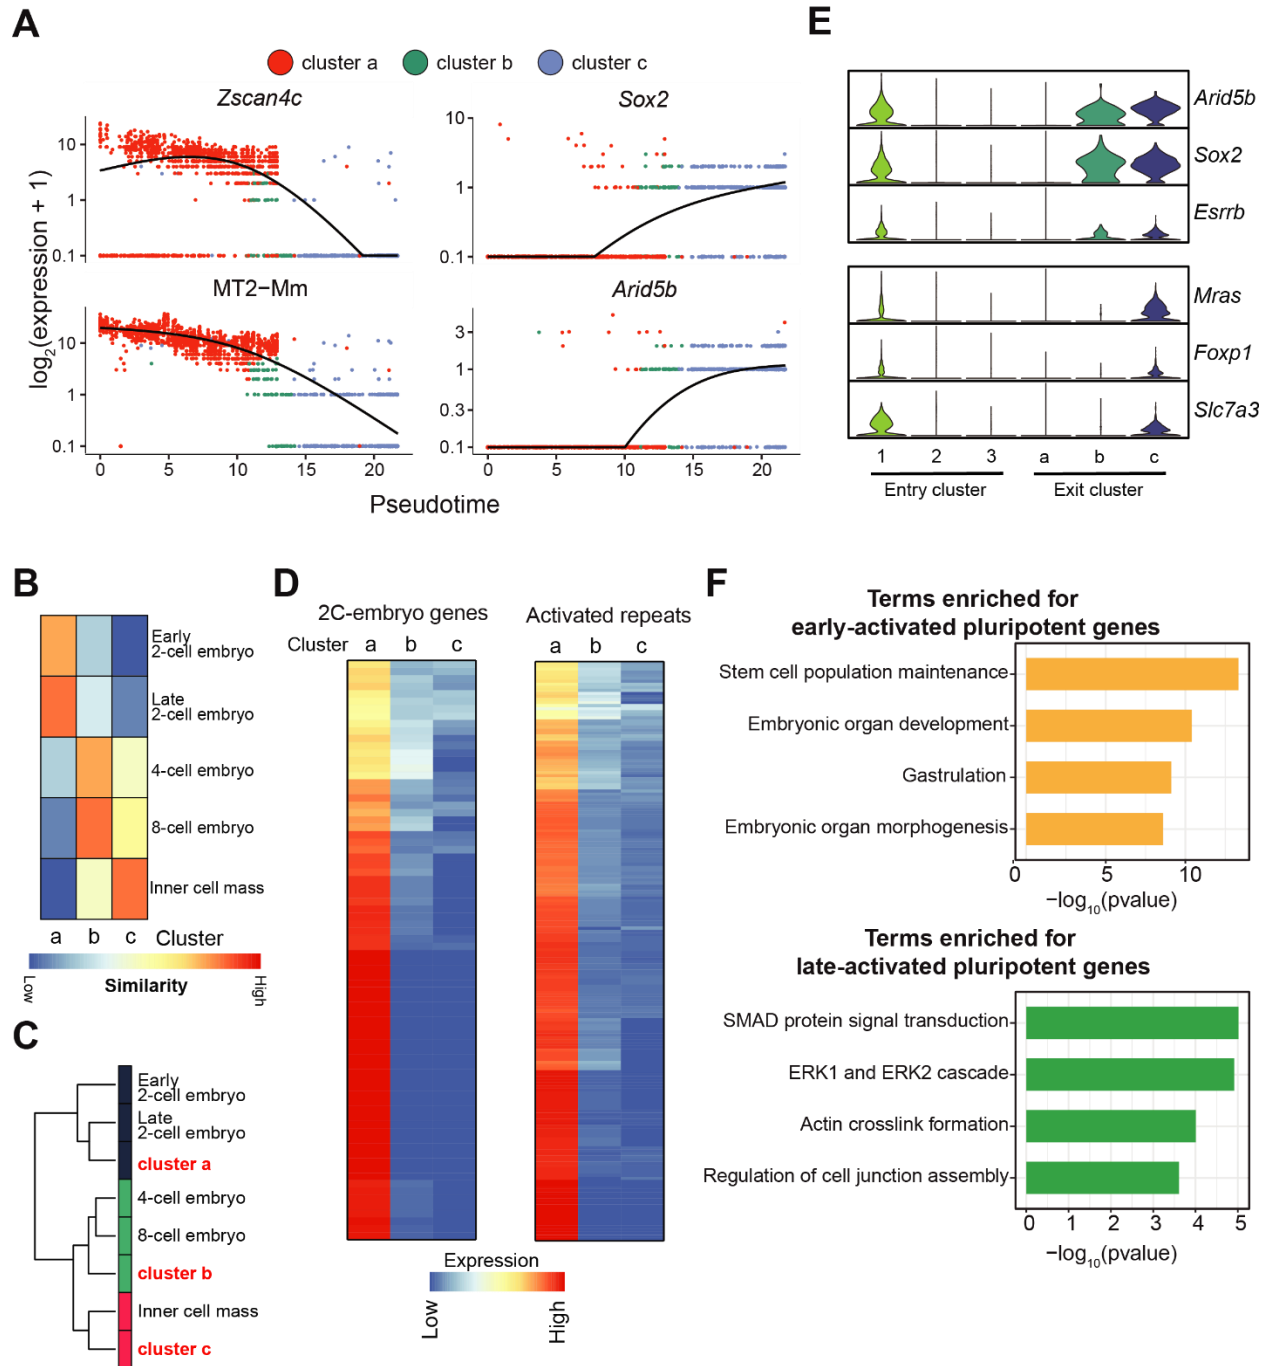

**fig. S3. Transcriptional dynamics of pluripotent genes, 2C-embryo genes, and 2C<sup>+</sup>-activated repeats during 2C-like to pluripotent state transition.** (A) Jitter plots showing the expression pattern of representative genes and repeats along the pseudotime. Each dot represents the  $\log_2$  expression level of the genes and repeats per-cell. The black line represents the fitted mean expression trend along the pseudotime. (B) Heatmap showing the degree of similarity between the transcriptional profiles of cell clusters derived from scRNA-seq and embryos of different preimplantation stages. (C) Hierarchical clustering (complete linkage) showing the

relationship between the scRNA-seq cell clusters and embryos of the different preimplantation stages. **(D)** Heatmap showing the normalized mean expression of 2C-embryo genes ( $2C^+$ -upregulated ZGA genes) and  $2C^+$ -activated repeats in each cell cluster. **(E)** Violin plot showing the expression of representative early-activated (top) and late-activated (bottom) pluripotent genes. **(F)** The  $-\log_{10}(\text{p-value})$  of the GO terms enriched in early-activated and late-activated genes (right, right-tailed Fisher-exact test).

**fig. S4**

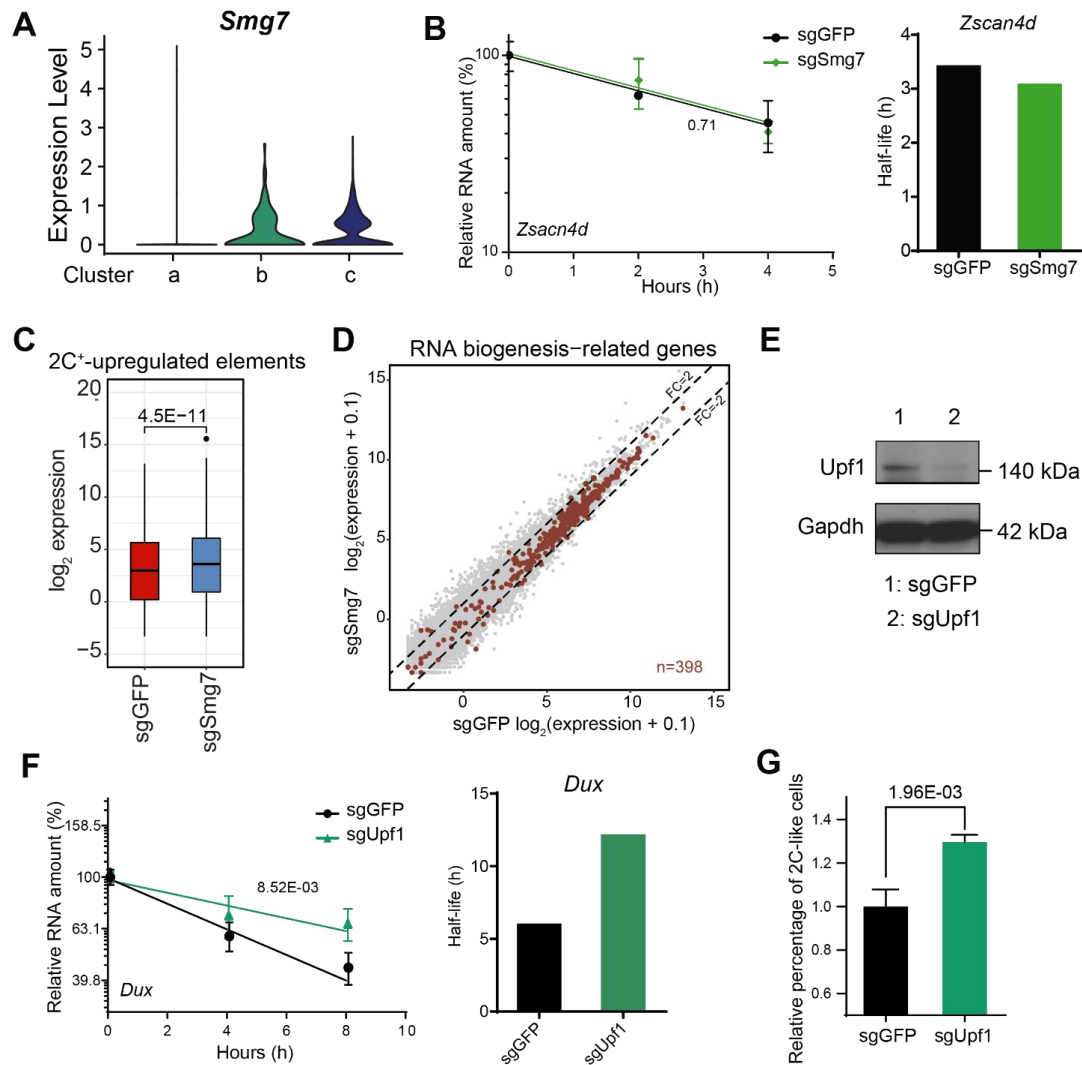

**fig. S4. *Smg7* destabilizes *Dux* mRNA directly through NMD.** (A) Violin plot showing the expression of *Smg7* in each cluster. Cluster a in this figure only includes cells collected at 24h. (B) mRNA half-life measured by qRT-PCR. Left panel, relative *Zscan4d* mRNA level in sgGFP or sgSmg7 cells after actinomycin D treatment. Right panel, the half-life of *Zscan4d* mRNA calculated from the left panel. (C) Box plot showing the  $\log_2$  level of  $2C^+$ -upregulated elements in *Dux*-activated mESCs infected with sgGFP or sgSmg7. P-values are calculated by two-tailed Mann-Whitney U-test. (D) Scatter plot showing the expression changes of 398 genes (marked in brown) involved in mRNA biogenesis (KEGG, BR:mmu03019) after *Smg7* depletion. (E) Western-blot confirming efficient Upf1 knockdown. (F) Measurement of mRNA half-life by qRT-PCR. Left panel, relative *Dux* mRNA quantity in sgGFP or sgUpf1 cells after actinomycin D treatment. Right panel, the half-life of *Dux* mRNA calculated based on the data presented in the middle panel. The p-values in panels B and F are calculated by standard t-test of the degradation curves. (G) The percentage of  $2C^+$ -like cells of sgUpf1-infected cells relative to control. P-value is calculated by unpaired t-test, two-tailed, two-sample unequal variance and is

shown as numbers in the figure. Data presented in panel **B, F, G** are mean  $\pm$  SD, n=3. Data presented in panels **E-G** were from experiments repeated at least twice with similar results.
